# Supplementary material for: Chemical constituents Antimicrobial activity Cytotoxicity of Moringa oleifera Seed Extract Grown in AL Mukhwa at Al-Baha Area, Saudi Arabia
Source: Research Square preprint supplement (doi:10.21203/rs.3.rs-7839782/v1), 2025-12-01
Supplement: Supplementary file 1 [file ae8532c6137a0c40b9ff66c9.docx]

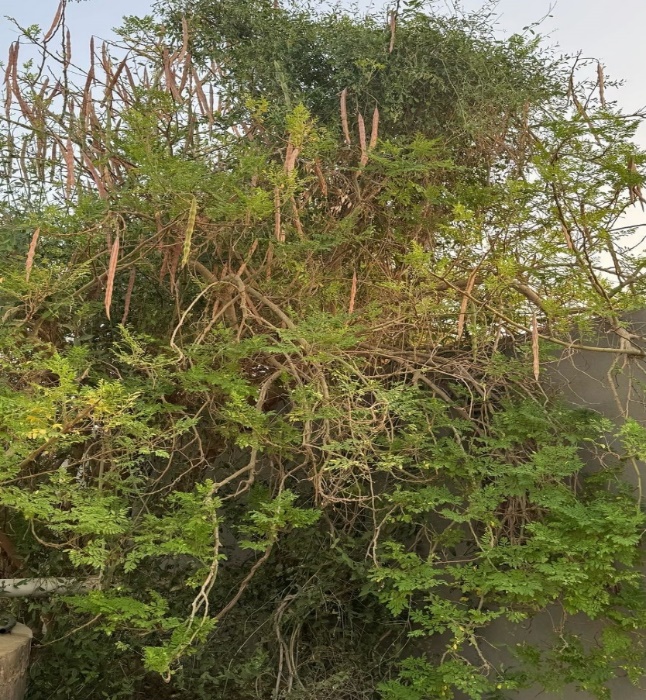


*Moringa oleifera*


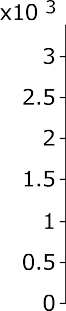

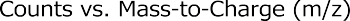

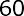

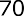

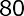

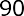

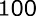

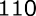

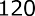

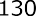

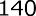

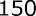

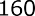

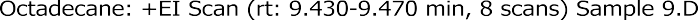

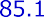

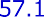

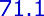

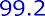

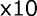

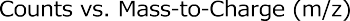

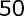

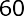

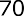

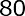

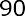

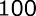

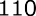

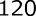

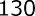

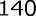

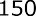

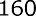

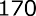

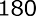

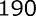

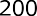

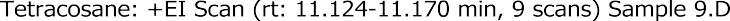

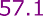

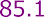

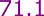

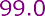

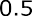

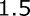

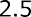

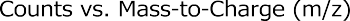

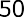

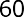

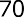

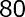

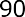

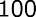

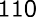

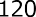

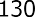

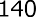

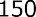

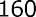

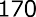

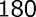

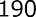

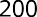

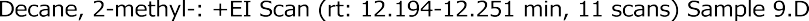

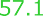

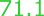

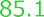

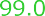

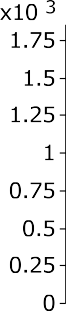

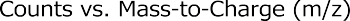

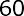

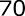

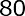

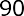

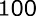

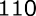

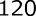

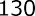

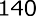

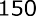

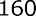

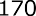

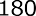

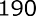

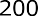

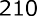

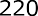

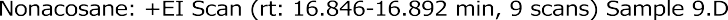

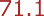

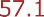

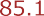

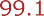

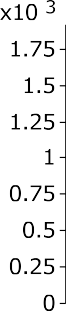

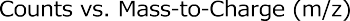

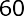

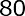

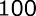

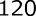

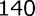

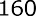

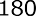


**High Performance Liquid Chromatography device (used in this study)**

**Polyphenol constituents of *Moringa* *oleifera* seed extract by HPLC.**

**.**

**Inhibitions zones (in mm) by *Moringa* *oleifera* ethanoic seed extracts against *Enterococcus* *faecalis***

**Inhibitions zones (in mm) by *Moringa* *oleifera* ethanoic seed extracts against *Staph* *aureus***

**Inhibitions zones (in mm) by *Moringa* *oleifera* ethanoic seed extracts against *Salmonella* *typhi***

**Inhibitions zones (in mm) by *Moringa* *oleifera* ethanoic seed extracts against *Pseudomonas aeruginosa***

**.**

**Inhibitions zones (in mm) by *Moringa* *oleifera* ethanoic seed extracts against *Escherichia* *coli*.**

**Inhibitions zones (in mm) by *Moringa* *oleifera* ethanoic seed extracts against fungi *Candida albicans.***

**Inhibitions zones (in mm) by *Moringa* *oleifera* ethanoic seed extracts against fungi *Aspergillus* *niger*.**

**Effect of *Moringa* *oleifera* seed extracts against colon cancer (HCT116 at different concentration.**

**Effect of *Moringa* *oleifera* seed extracts against Effect of *Moringa* *oleifera* seed extract against PANC1 at different concentration.**

**Effect of *Moringa* *oleifera* seed extract against Kasumi1 cell at different concentration.**
