# Supplementary material for: Chemical constituents Antimicrobial activity Cytotoxicity of Moringa oleifera Seed Extract Grown in AL Mukhwa at Al-Baha Area, Saudi Arabia
Source: Research Square preprint supplement (doi:10.21203/rs.3.rs-7839782/v1), 2025-12-01
Supplement: Supplementary file 2 [file ee912e7322e68beda4a12233.docx]

Table.1. Chemical constituents of *Moringa* *oleifera* seed extract identified by GC-MS

| Peak | Name | RT | Area | Area Sum% |
| --- | --- | --- | --- | --- |
| 1 | Octadecane | 9.448 | 39078.73 | 1.02 |
| 2 | Tetracosane | 11.147 | 48566.76 | 1.27 |
| 3 | Decane, 2-methyl- | 12.228 | 56701.61 | 1.48 |
| 4 | Nonacosane | 16.875 | 30316.6 | 0.79 |
| 5 | 7,9-di-tert-butyl-1-oxaspiro[4.5]deca-6,9-diene-2,8-dione | 16.915 | 68852.29 | 1.8 |
| 6 | methyl 13-methyltetradecanoate | 17.081 | 27815.18 | 0.73 |
| 7 | tridecanal | 17.35 | 144096.45 | 3.76 |
| 8 | n-Hexadecanoic acid | 17.607 | 1533341.04 | 40.01 |
| 9 | 9-Octadecenoic acid (Z)-, methyl ester | 18.952 | 170992.12 | 4.46 |
| 10 | Oleic acid | 19.45 | 1712871.55 | 44.69 |

Table.2. Chemical constituents of *Moringa* *oleifera* seed extract identified by HPLC.

| No | Name of the Poly phenol compound | Ret. Time | Area% | Chemical formula |
| --- | --- | --- | --- | --- |
| 1 | 3,4,5-trihydroxybenzoic acid (Gallic acid) | 3.546 | 9.0449 | C7H6O5 |
| 2 | 3(3,4Dihydroxycinnamoyl)quinate (Chlorogenic acid) | 4.292 | 5.9777 | C16H18O9 |
| 3 | (2R,3S)-2-(3,4Dihydroxphenyl)-3,4-dihydro-2H-chromene-3,5,7-triol ((Catechin) | 4.468 | 0.0000 | C15H14O6 |
| 4 | Methyl gallate | 5.590 | 1.7308 |  |
| 5 | 3,4-Dihydroxycinnamic acid (Coffeic acid)) | 5.959 | 6.0366 | C9H8O4 |
| 6 | 4-Hydroxy-3,5-dimethoxybenzoic acid (Syringic acid) | 6.356 | 2.5131 | 1C9H10O5 |
| 7 | Rutin | 6.891 | 19.3841 | C27H30O1 |
| 8 | 4,4,5,5,6,6-Hexahydroxydiphenic acid 2,6,2,6-dilactone (Ellagic acid) | 7.232 | 2.7727 | C14H6O8 |
| 9 | 4-Hydroxycinnamic (Coumaric acid) | 8.642 | 5.7318 | C9H8O3 |
| 10 | 4-Hydroxy-3-methoxybenzaldehyde (Vanillin) | 9.058 | 3.2388 | C8H8O3 |
| 11 | hydroxycinnamic acid (Ferulic acid) | 9.686 | 0.8088 | C10H10O |
| 12 | 5,7-Dihydroxy-2-(4-hydroxyphenyl)chromn-4-one (Naringenin | 9.980 | 0.6494 | C15H12O5 |
| 13 | 2E)-3-phenylprop-2-enoic acid (Cinnamic Acid) | 19.423 | 0.8706 | C9H8O2 |
| 14 | Kaempferol | 20.773 | 41.2406 |  |

| | Table.3.Inhibitions zones (mm) of *Moringa* *oleifera* seed extract   | Pathogenic microorganism | Inhibition zone (in mm) | Control | | --- | --- | --- | | *Enterococcus faecalis (ATCC 29212 )* | 36±0.2 | 25±0.1 | | *Staph.aureus (ATCC 6538)* | 30±0.1 | 25±0.1 | | *Salmonella typhi (ATCC 6539)* | 26±0.2 | 22±0.1 | | *Pseudomonas aeruginosa (ATCC 90274)* | 11±0.7 | 16±0.1 | | *Escherichia coli (ATCC 8739)* | 24±0.7 | 24 ±0.2 | | *Candida albicans (ATCC 10221)* | 31±0.1 | 26±0.3 | | *Aspergillus niger* (AUMC 14260) | 8±0.7 | 18±0.1 | | | --- | --- | --- | --- | --- | --- | --- | --- | --- | --- | --- | --- | --- | --- | --- | --- | --- | --- | --- | --- | --- | --- | --- | --- | --- | |
| --- | --- | --- | --- | --- | --- | --- | --- | --- | --- | --- | --- | --- | --- | --- | --- | --- | --- | --- | --- | --- | --- | --- | --- | --- | --- |

* NA: No activity

* Control for Bacteria was Gentamicin and for fungi was Fluconazole.

**Table 4. Minimum inhibitory concentration (MIC) (g/ml). Minimum bactericidal/fungcidal concentration (MBC) (g/ml) and MBC/MIC values by *Adansonia* *digitata* pulp extract.**

| **Bacteria** | MIC | MBC | MBC/MIC |
| --- | --- | --- | --- |
| *Enterococcus faecalis (ATCC 29212)* (Gram+) | 0.06 | 0.11 | 1.8 |
| *Staph.aureus (ATCC 6538)* (Gram+) | 0.07 | 0.12 | 1.7 |
| *Salmonella typhi (ATCC 6539)* (Gram-) | 0.09 | 0.20 | 2.2 |
| *Pseudomonas aeruginosa (ATCC 90274)* (Gram-) | 0.14 | 0.47 | 3.6 |
| *Escherichia coli (ATCC 8739*) (Gram-) | 0.10 | 0.22 | 2.2 |
| **Fungi** | MIC | MFC | MFC/MIC |
| *Candida albicans (ATCC 10221)* | 0.07 | 0.13 | 1.8 |
| *Aspergillus niger* (AUMC 14260) | 0.16 | 0.51 | 3.2 |

**Table.5. Effect of *Moringa* *oleifera* seed extract against Hct116, PANC1 and Kasumi1 cell at different concentration.**

| ID | Ug/ml | Mean O.D | ±SE | Viability % | Toxicity % | IC50  ± SD |
| --- | --- | --- | --- | --- | --- | --- |
| Hct116 | -------- | 0.695 | 0.004933 | 100 | 0 | Ug |
| *Moringa* *oleifera* seed extract against Hct116 | 1000 | 0.024667 | 0.002028 | 3.549160671 | 96.45083933 | 117.2 ± 1.56 |
| 500 | 0.030667 | 0.000882 | 4.412470024 | 95.58752998 |
| 250 | 0.091333 | 0.00348 | 13.14148681 | 86.85851319 |
| 125 | 0.308333 | 0.005783 | 44.36450839 | 55.63549161 |
| 62.5 | 0.624 | 0.005508 | 89.78417266 | 10.21582734 |
| 31.25 | 0.674667 | 0.00318 | 97.07434053 | 2.925659472 |
| PANC1 | -------- | 0.741 | 0.002309 | 100 | 0 | Ug |
| *Moringa* *oleifera* seed extract against PANC1 | 1000 | 0.018 | 0.000577 | 2.429149798 | 97.5708502 | 77.55 ± 0.61 |
| 500 | 0.021 | 0.002082 | 2.834008097 | 97.1659919 |
| 250 | 0.028 | 0.002887 | 3.778677463 | 96.22132254 |
| 125 | 0.083667 | 0.00584 | 11.29104813 | 88.70895187 |
| 62.5 | 0.410333 | 0.007839 | 55.37561853 | 44.62438147 |
| 31.25 | 0.71 | 0.004619 | 95.81646424 | 4.183535762 |
| Kasumi1 | -------- | 0.437 | 0.002309 | 100 | 0 | Ug |
| *Moringa* *oleifera* seed extract against Kasumi1 | 31.25 | 0.405 | 0.006658 | 92.67734554 | 7.322654462 |  |
| 1000 | 0.017333 | 0.000882 | 3.966437834 | 96.03356217 | 66.86 ± 0.25 |
| 500 | 0.017333 | 0.000333 | 3.966437834 | 96.03356217 |
| 250 | 0.020667 | 0.001202 | 4.72921434 | 95.27078566 |
| 125 | 0.022 | 0.001732 | 5.034324943 | 94.96567506 |
| 62.5 | 0.224667 | 0.004485 | 51.41113654 | 48.58886346 |
| 31.25 | 0.346333 | 0.004256 | 79.25247902 | 20.74752098 |
